# Supplementary material for: Carbazole-based linear conjugated molecules: structure–property relationships and device properties
Source: Royal Society of Chemistry journal article supplement (doi:10.1039/c3ra42318b), 2013-01-01
Supplement: c3ra42318b.pdf [file c3ra42318b.pdf]

## Supporting Information

### Carbazole Based Linear Conjugated Molecules: Structure Property Relationship and Device Properties

*Vandana Bhalla,<sup>\*a</sup> Gopal Singh,<sup>a</sup> Manoj Kumar,<sup>\*a</sup> Charan Singh<sup>b</sup>, Madhu Rawat<sup>b</sup> and R. S.*

*Anand<sup>b</sup>*

a Department of Chemistry, UGC Sponsored-Centre for Advanced Studies-I, Guru Nanak  
Dev University, Amritsar-143005, Punjab, India

b Department of Electrical Engineering, Indian Institute of Technology, Kanpur 208016,  
India

mksharmaa@yahoo.co.in; vanmanan@yahoo.co.in

| <b>Content</b>                                                     | <b>Page No.</b> |
|--------------------------------------------------------------------|-----------------|
| 1. Normalised absorption spectra of <b>1</b> in different solvents | S2              |
| 2. Normalised emission spectra of <b>1</b> in different solvents   | S2              |
| 3. Normalised absorption of <b>2</b> in different solvents         | S3              |
| 4. Normalised emission spectra of <b>2</b> in different solvents   | S3              |
| 5. Normalised absorption spectra of <b>3</b> in different solvents | S4              |
| 6. Normalised emission spectra of <b>3</b> in different solvents   | S4              |
| 7. Normalised absorption spectra of <b>4</b> in different solvents | S5              |
| 8. Normalised emission spectra of <b>4</b> in different solvents   | S5              |
| 9. Normalised absorption spectra of <b>5</b> in different solvents | S6              |
| 10. Normalised emission spectra of <b>5</b> in different solvents  | S6              |
| 11. Fluorescence spectra of <b>1 - 5</b> in thin Film              | S7              |
| 12. Cyclic voltammetric studies of <b>1 - 5</b>                    | S7-S10          |
| 13. Electroluminescence spectra of device of <b>4</b>              | S10             |
| 14. ILV characteristics of <b>3</b> and <b>5</b>                   | S10-S11         |
| 15. <sup>1</sup> H NMR spectrum of <b>2 - 5</b>                    | S12-S15         |
| 16. <sup>13</sup> C NMR spectrum of <b>2 - 5</b>                   | S16-S29         |
| 17. Mass spectrum of <b>2 - 5</b>                                  | S20-S23         |
| 18. HPLC data of <b>2 - 5</b>                                      | S24-S25         |

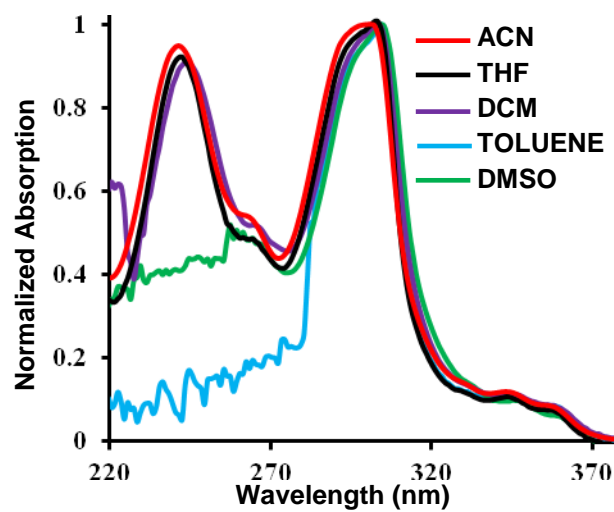

**Figure S1.** Normalized absorption spectra of compound **1** in different solvents

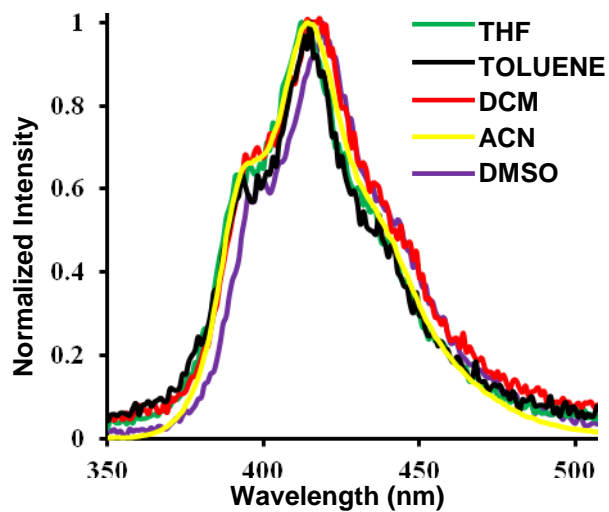

**Figure S2.** Normalized fluorescence spectra of compound **1** ( $\lambda_{\text{ex}} = \lambda_{\text{max}}$ ) in different solvents

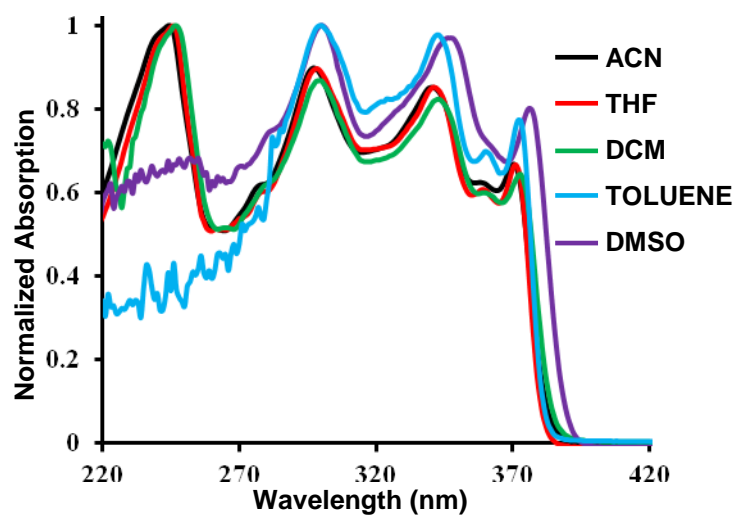

**Figure S3.** Normalized absorption spectra of compound **2** in different solvents

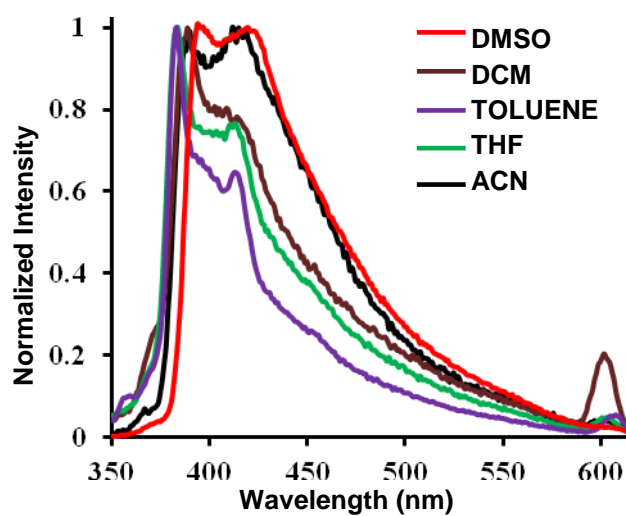

**Figure S4.** Normalized Fluorescence spectra of compound **2** ( $\lambda_{\text{ex}} = \lambda_{\text{max}}$ ) in different solvents

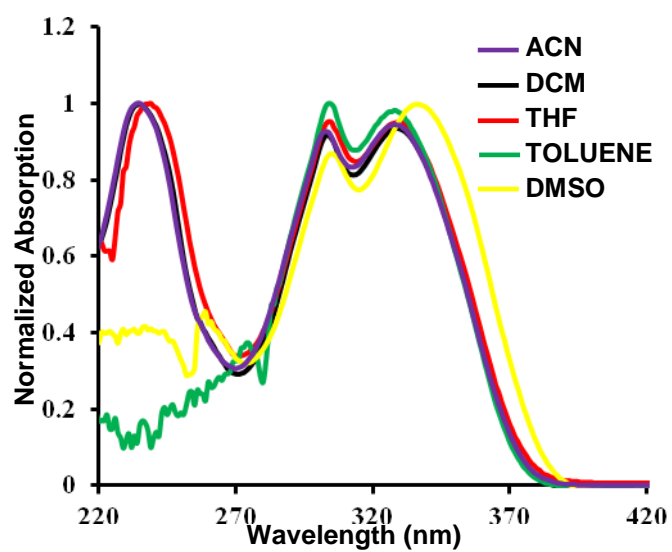

**Figure S5.** Normalized absorption spectra of compound **3** in different solvents

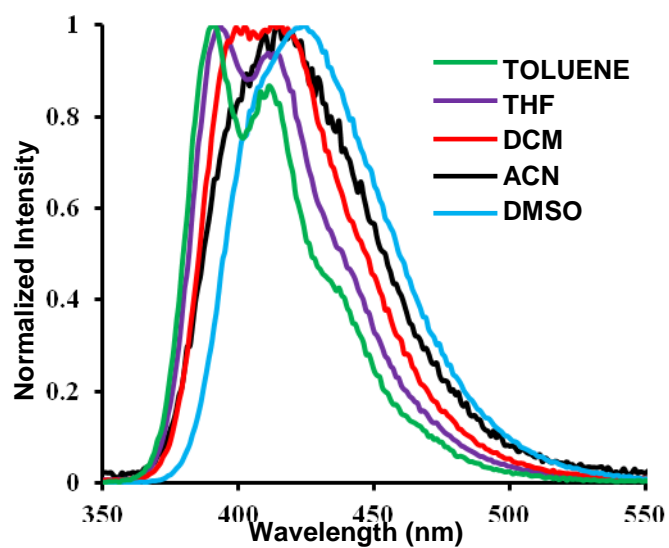

**Figure S6.** Normalized Fluorescence spectra of compound **3** ( $\lambda_{\text{ex}} = \lambda_{\text{max}}$ ) in different solvents

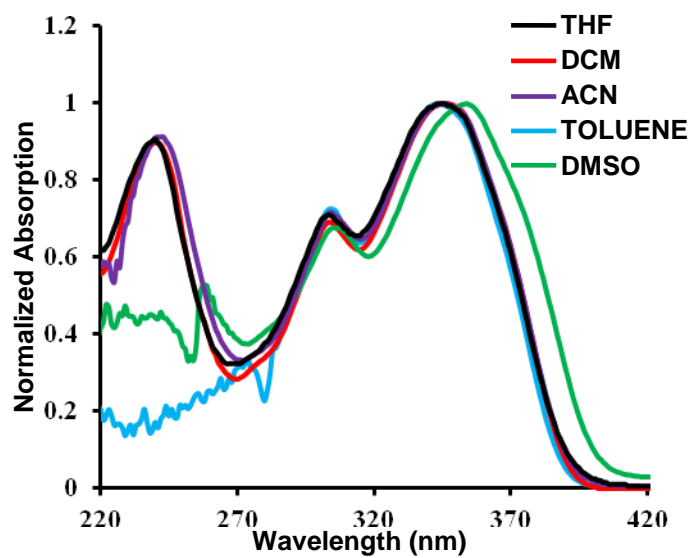

**Figure S7.** Normalized absorption spectra of compound **4** in different solvents

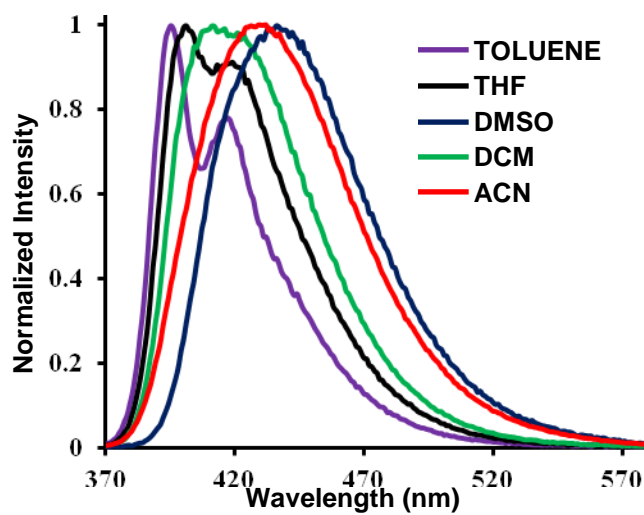

**Figure S8.** Normalized Fluorescence spectra of compound **4** ( $\lambda_{\text{ex}} = \lambda_{\text{max}}$ ) in different solvents

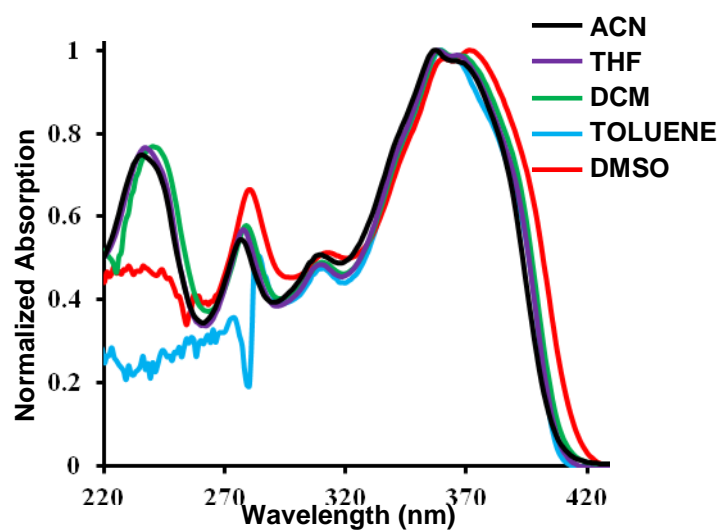

**Figure S9.** Normalized absorption spectra of compound G5 in different

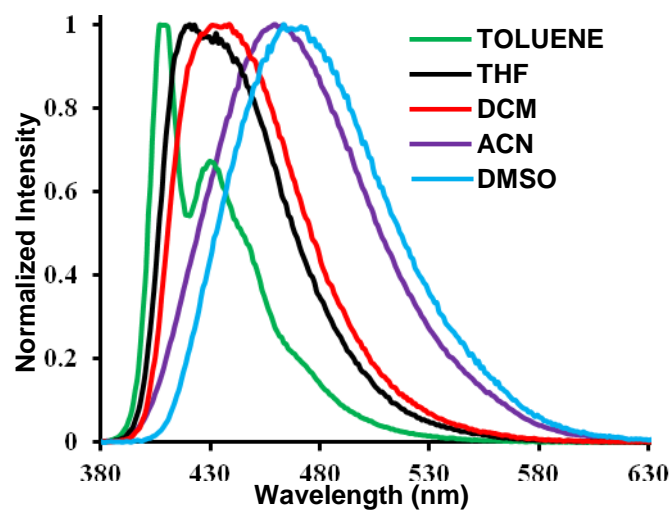

**Figure S10.** Normalized Fluorescence spectra of compound 5 ( $\lambda_{\text{ex}} = \lambda_{\text{max}}$ ) in different solvents

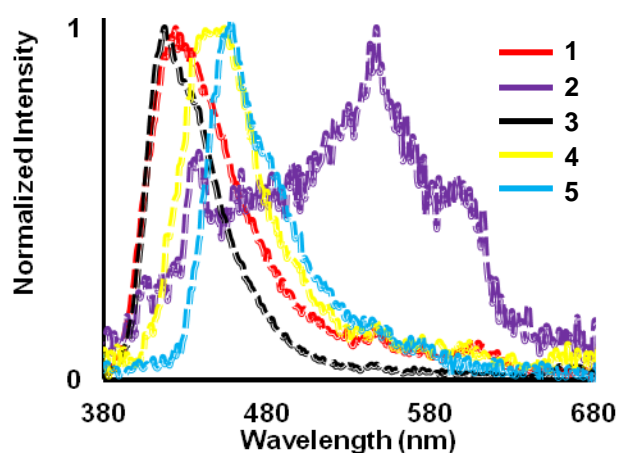

**Figure S11.** Normalised fluorescence spectra of **1** - **5** in thin films ( $\lambda_{\text{ex}}$  of **1** = 301 nm, **2** = 298 nm, **3** = 329 nm, **4** = 345 nm, and **5** = 358 nm)

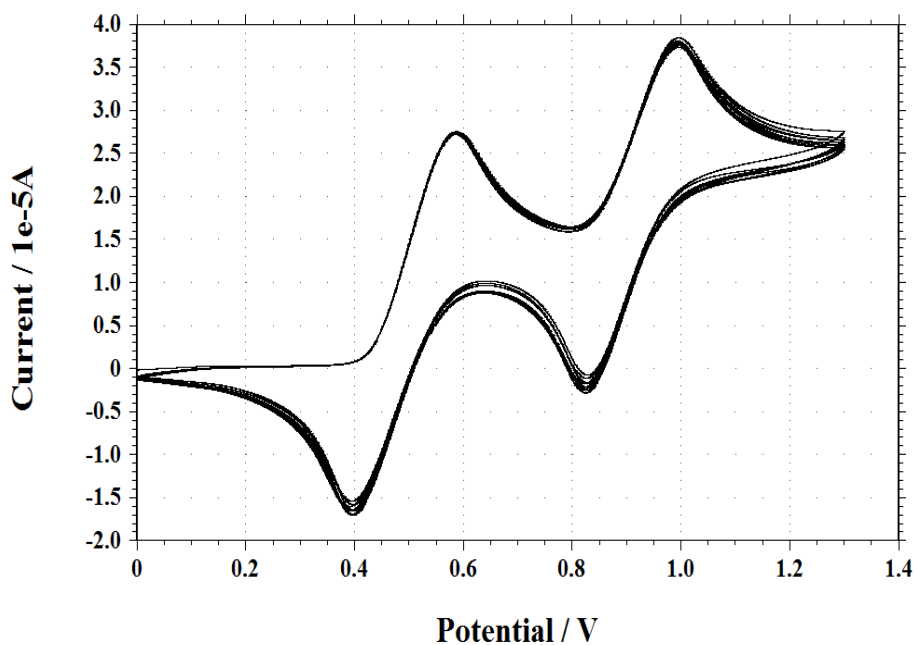

**Figure S12.** Repeated cyclic voltammograms of **1** in DCM at 50mV/sec. (10 cycles)

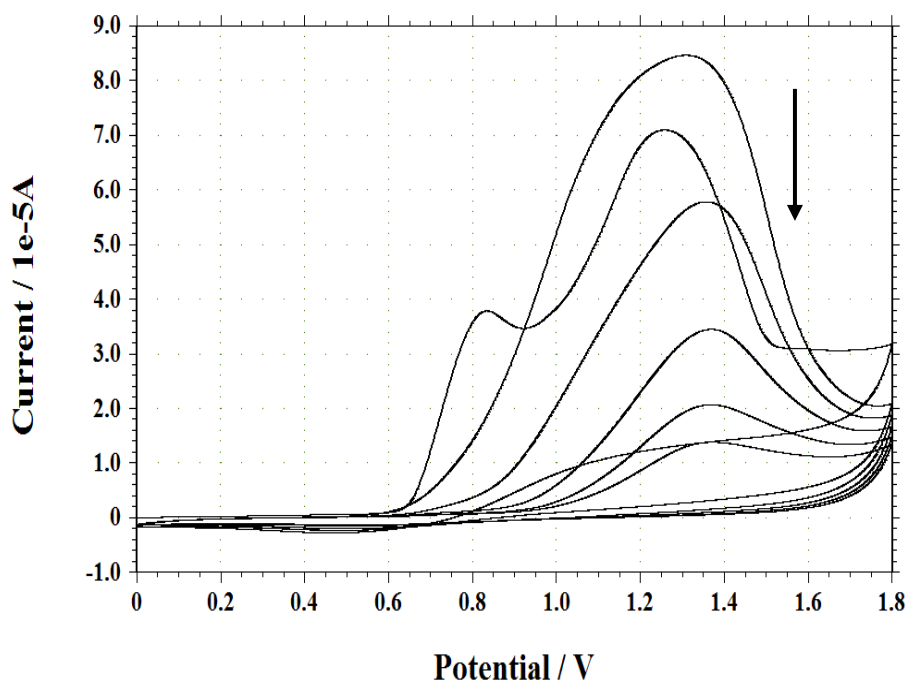

**Figure S13.** Repeated cyclic voltammograms of **2** in DCM at 50mV/sec. (5 cycles)

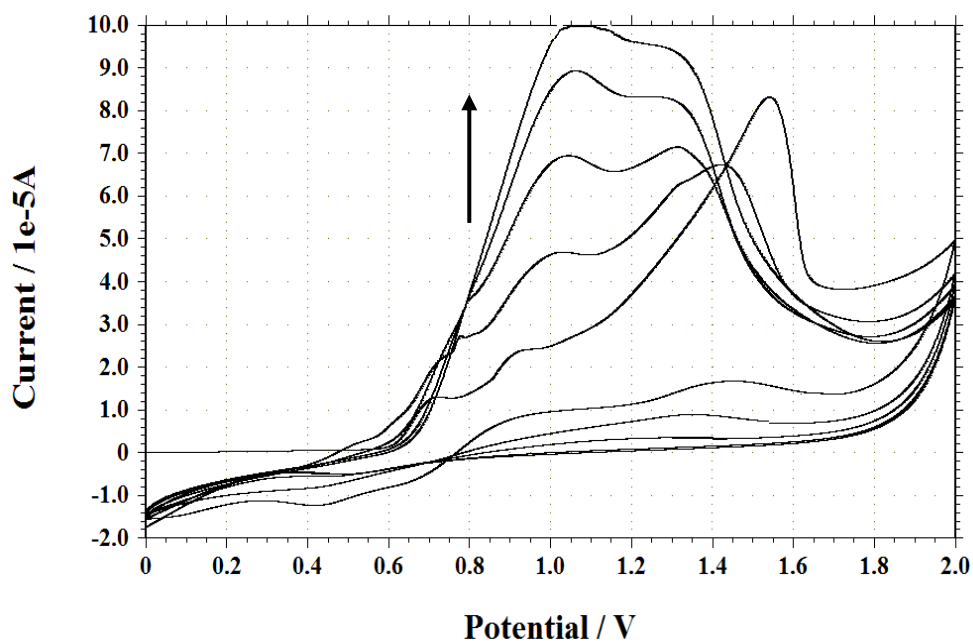

**Figure S14.** Repeated cyclic voltammograms of **3** in DCM at 50mV/sec. (5 cycles)



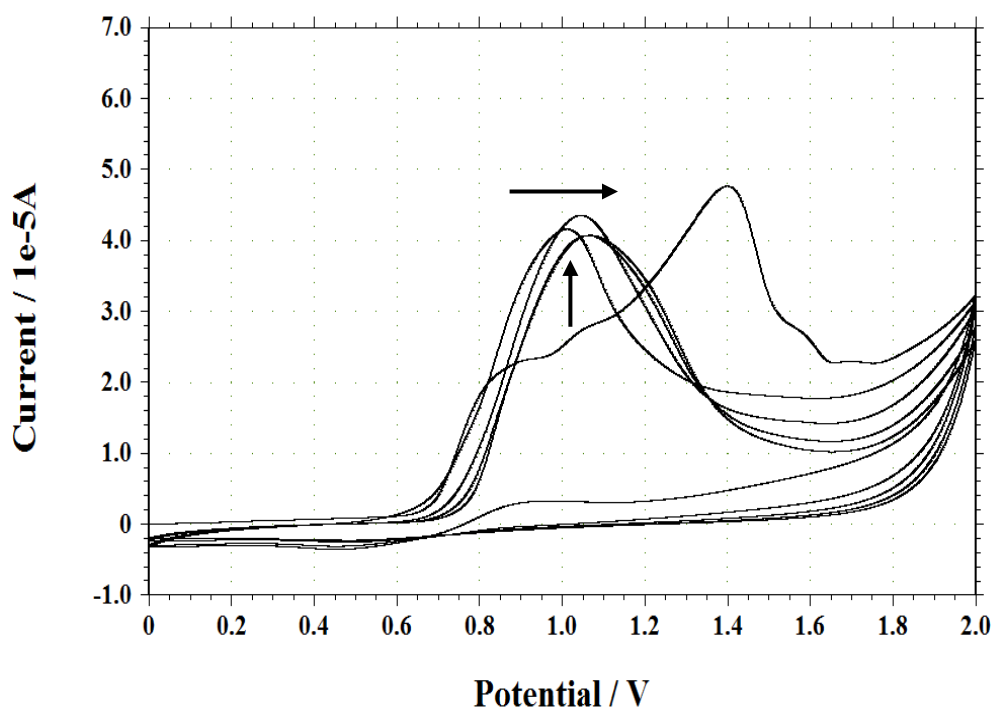

**Figure S15.** Repeated cyclic voltammograms of **4** in DCM at 50mV/sec. (5 cycles)

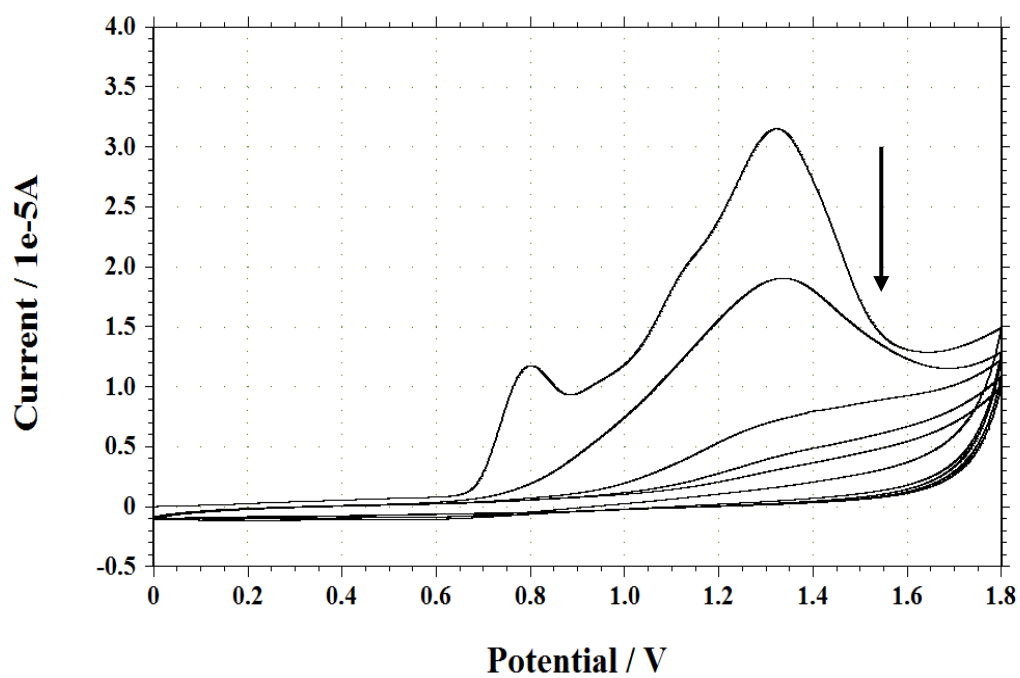

**Figure S16.** Repeated cyclic voltammograms of **5** in DCM at 50mV/sec.(5 cycles)

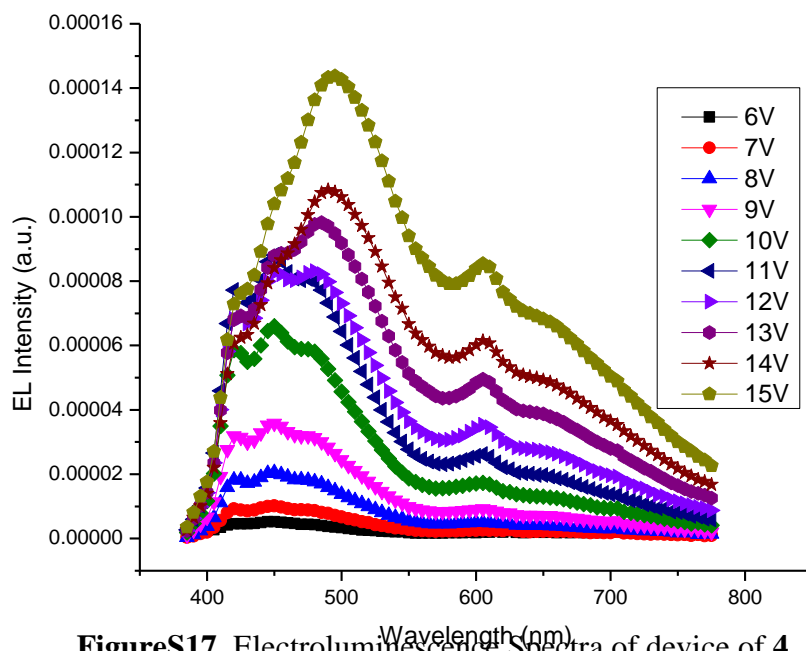

**FigureS17.** Electroluminescence Spectra of device of **4**

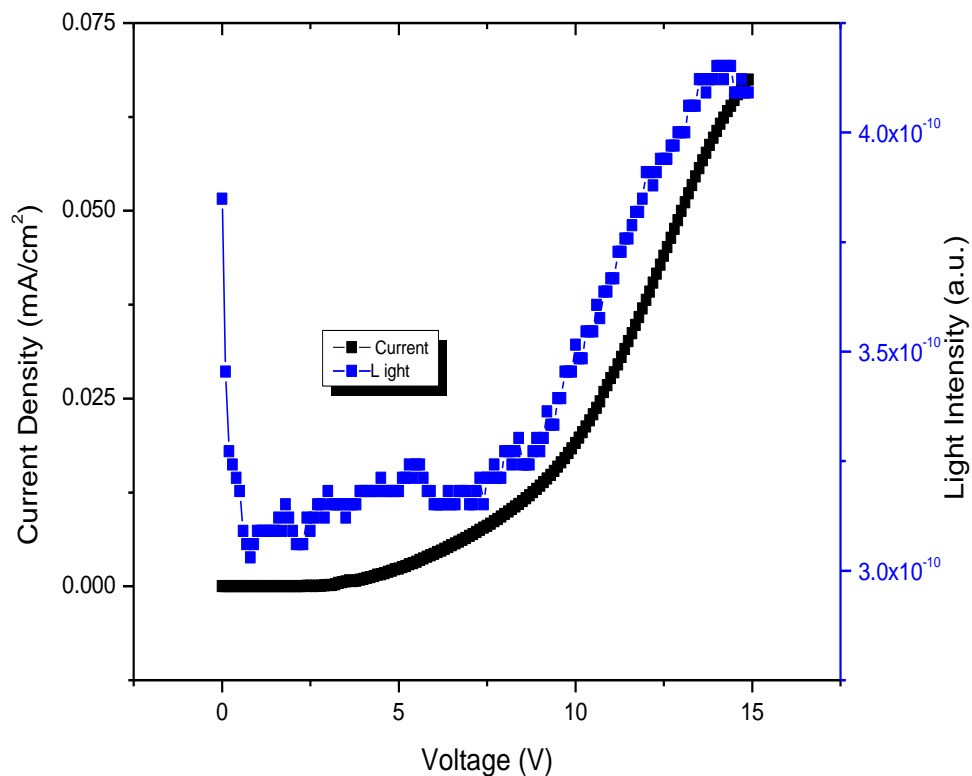

**Figure S18.** ILV characteristics of device of **3**

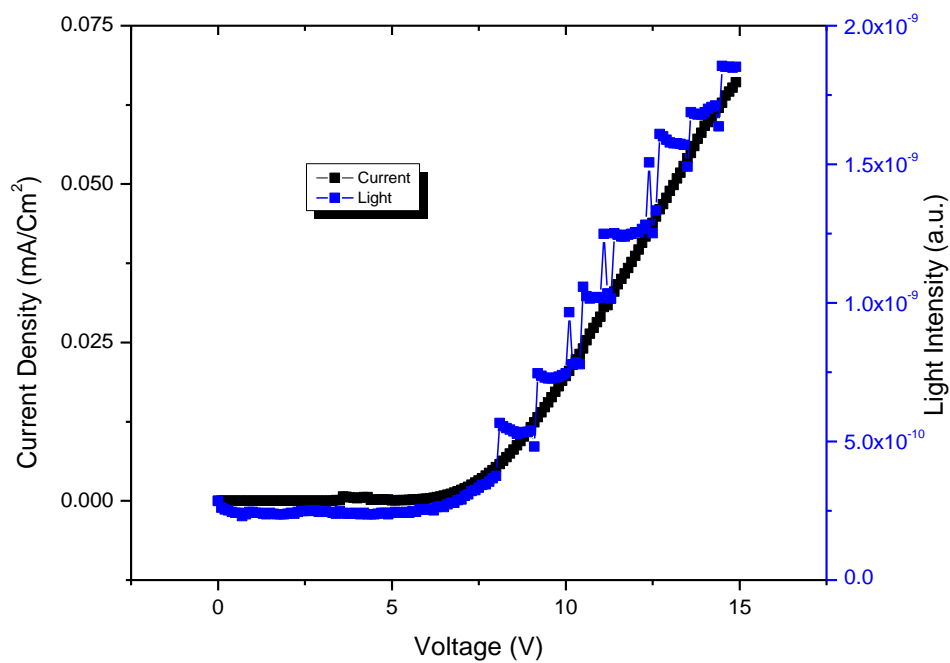

**Figure S19.** ILV characteristics of device of **5**

**<sup>1</sup>H NMR of Compound 2 in CDCl<sub>3</sub>**

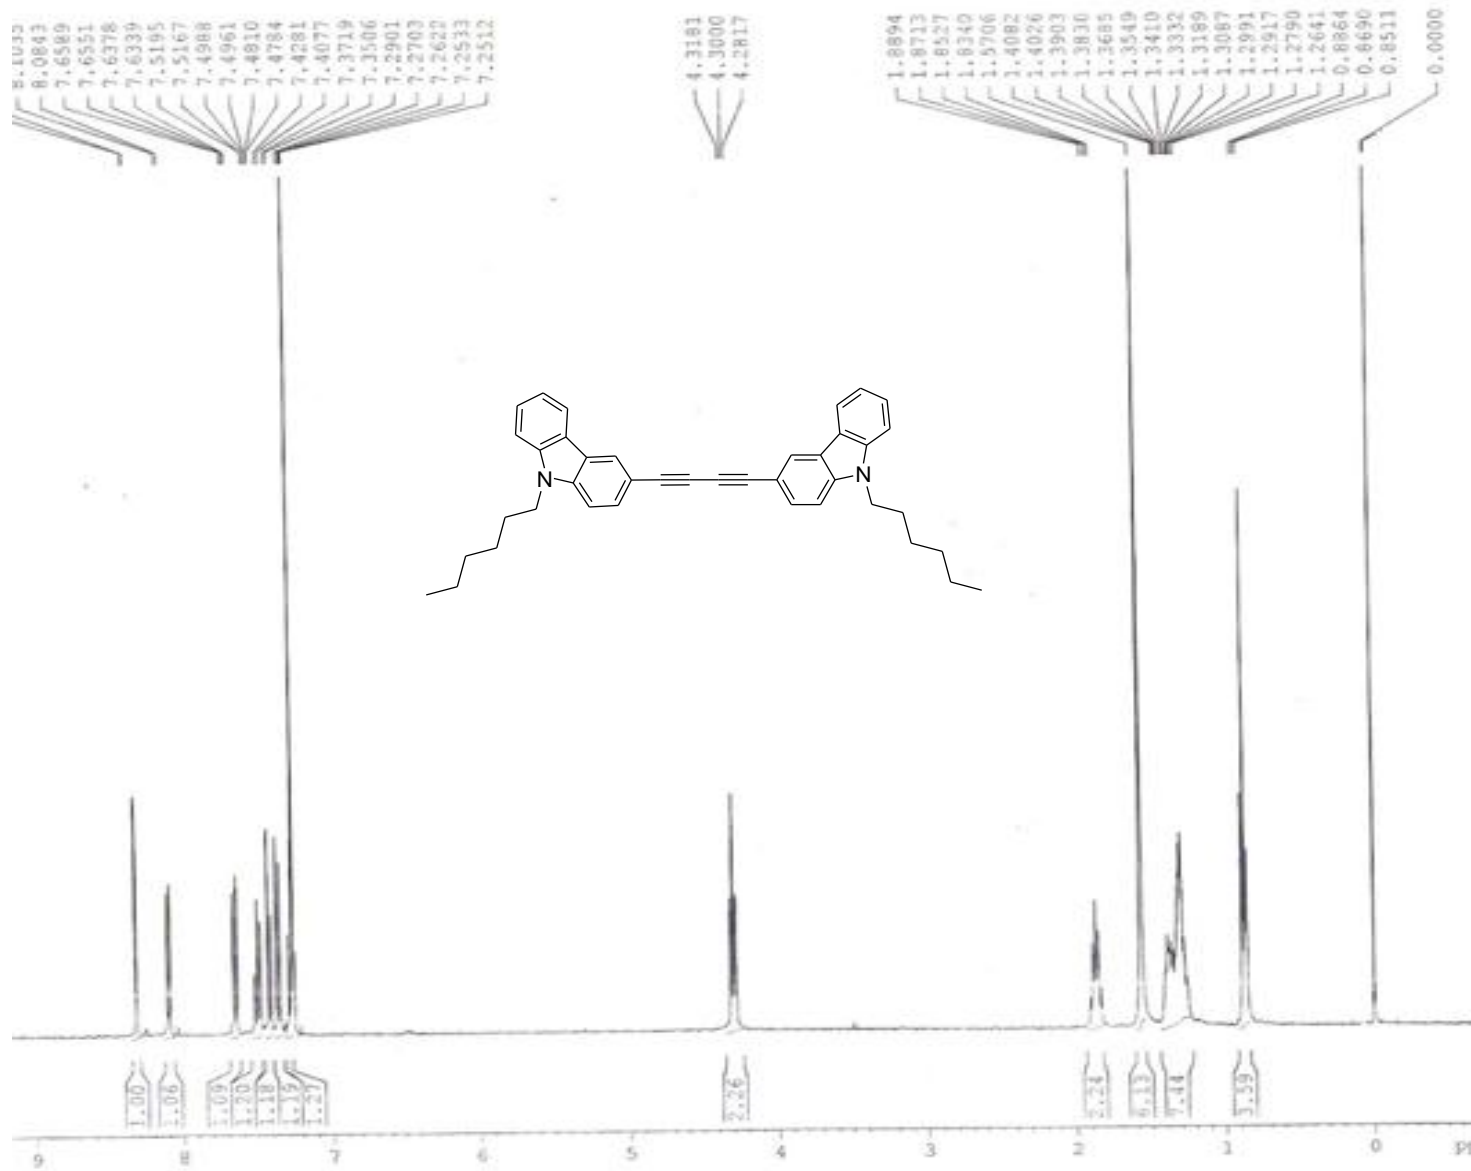

**Figure S20. <sup>1</sup>H NMR of Compound 2 in CDCl<sub>3</sub>**

### $^1\text{H}$ NMR of Compound 3 in $\text{CDCl}_3$

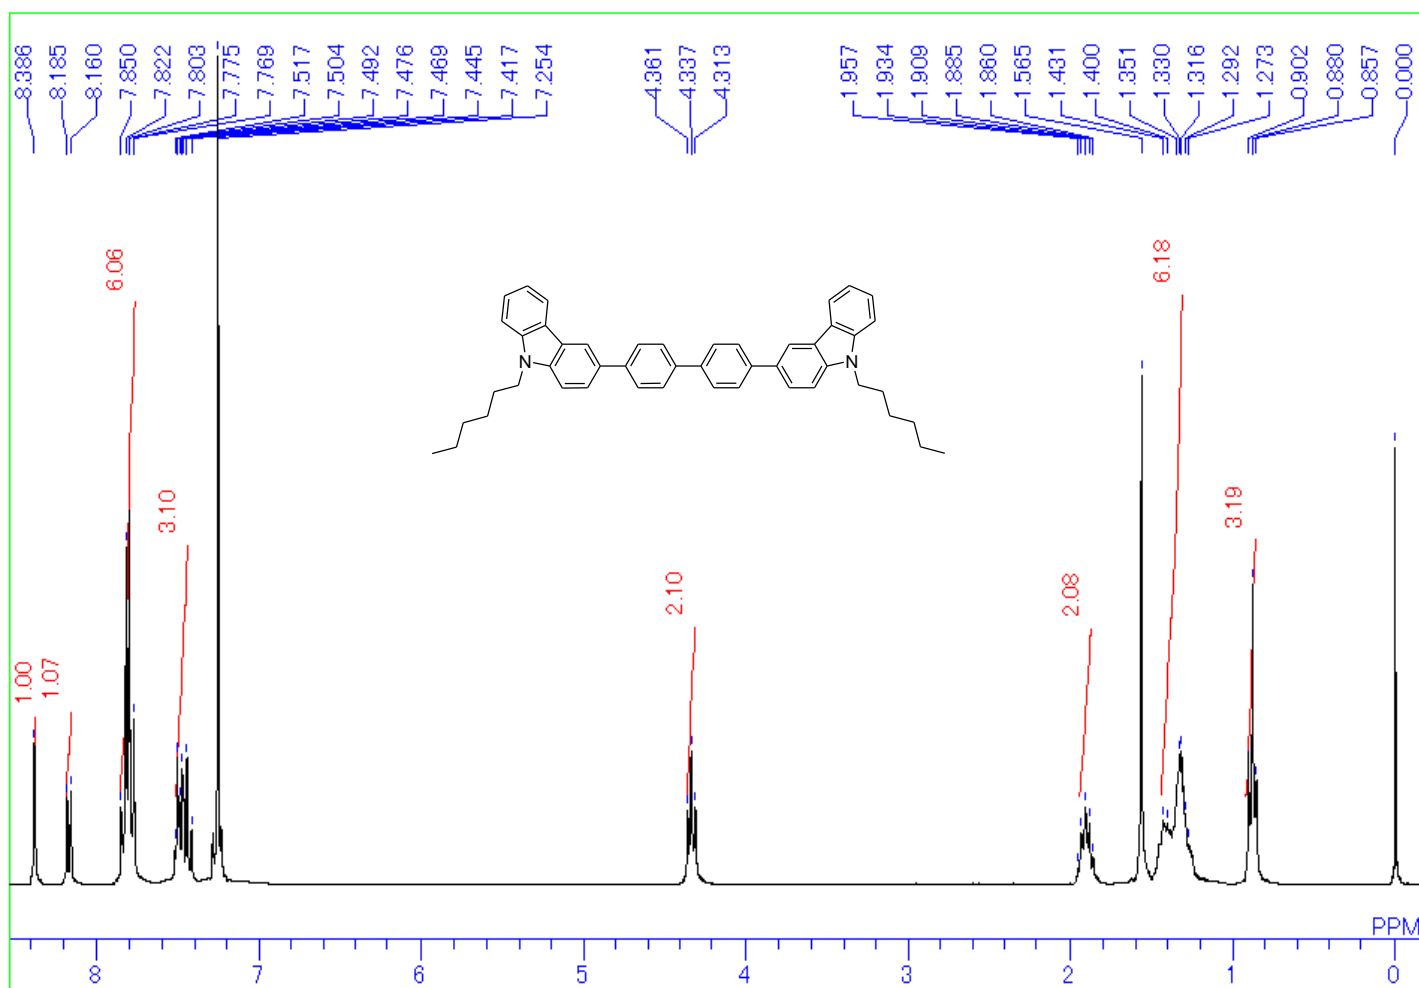

Figure S21.  $^1\text{H}$  NMR of Compound 3 in  $\text{CDCl}_3$

### $^1\text{H}$ NMR of Compound 4 in $\text{CDCl}_3$

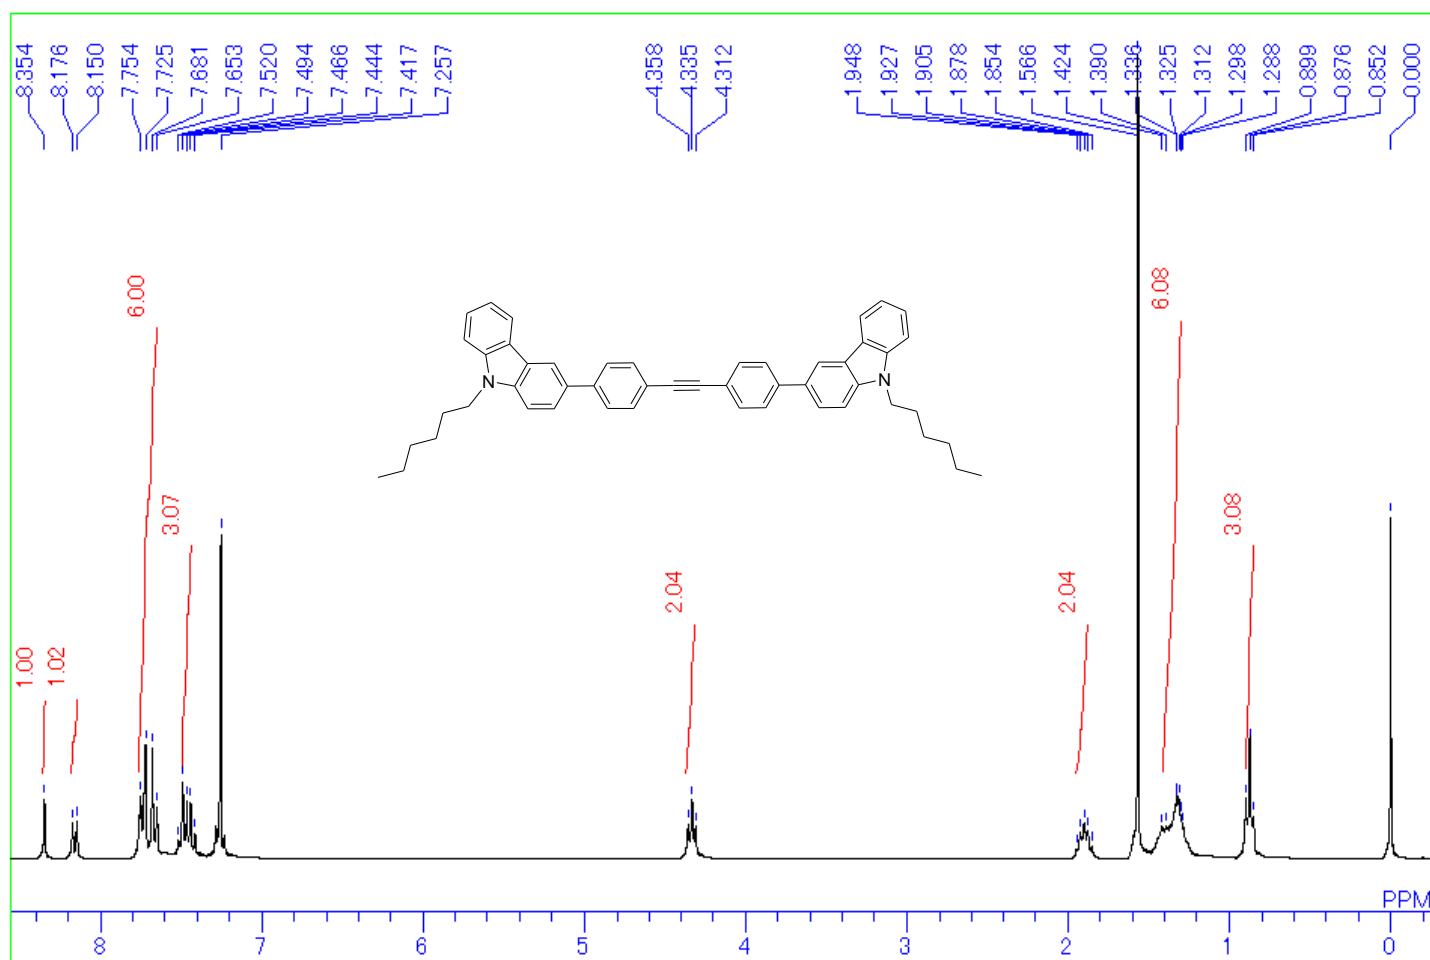

Figure S22.  $^1\text{H}$  NMR of Compound 4 in  $\text{CDCl}_3$

### $^1\text{H}$ NMR of Compound 5 in $\text{CDCl}_3$

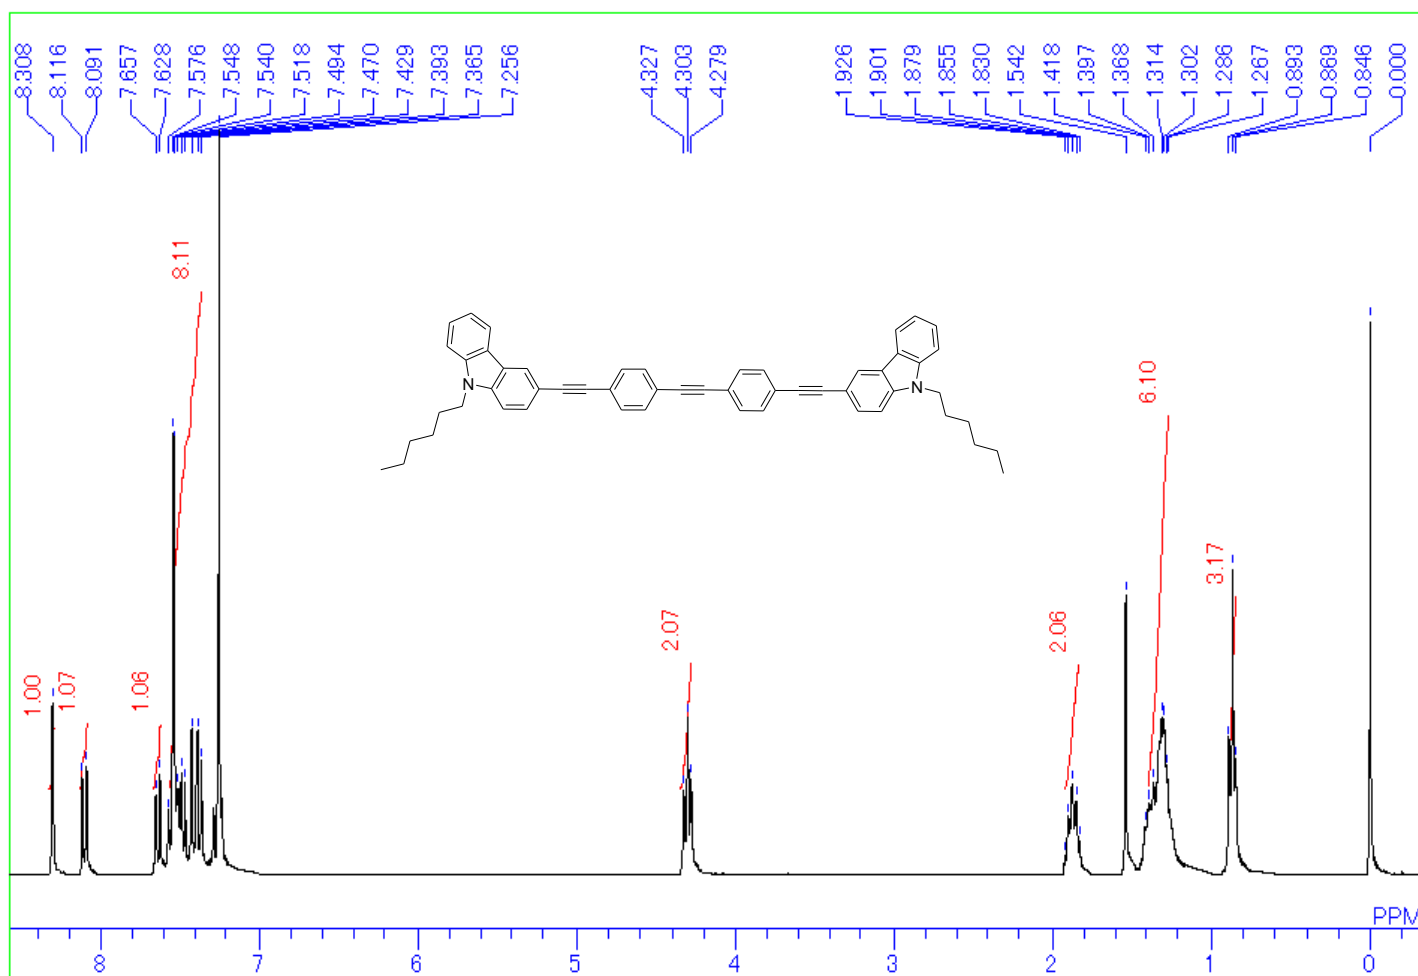

Figure S23.  $^1\text{H}$  NMR of Compound 5 in  $\text{CDCl}_3$

**$^{13}\text{C}$  NMR of Compound 2 in  $\text{CDCl}_3$**

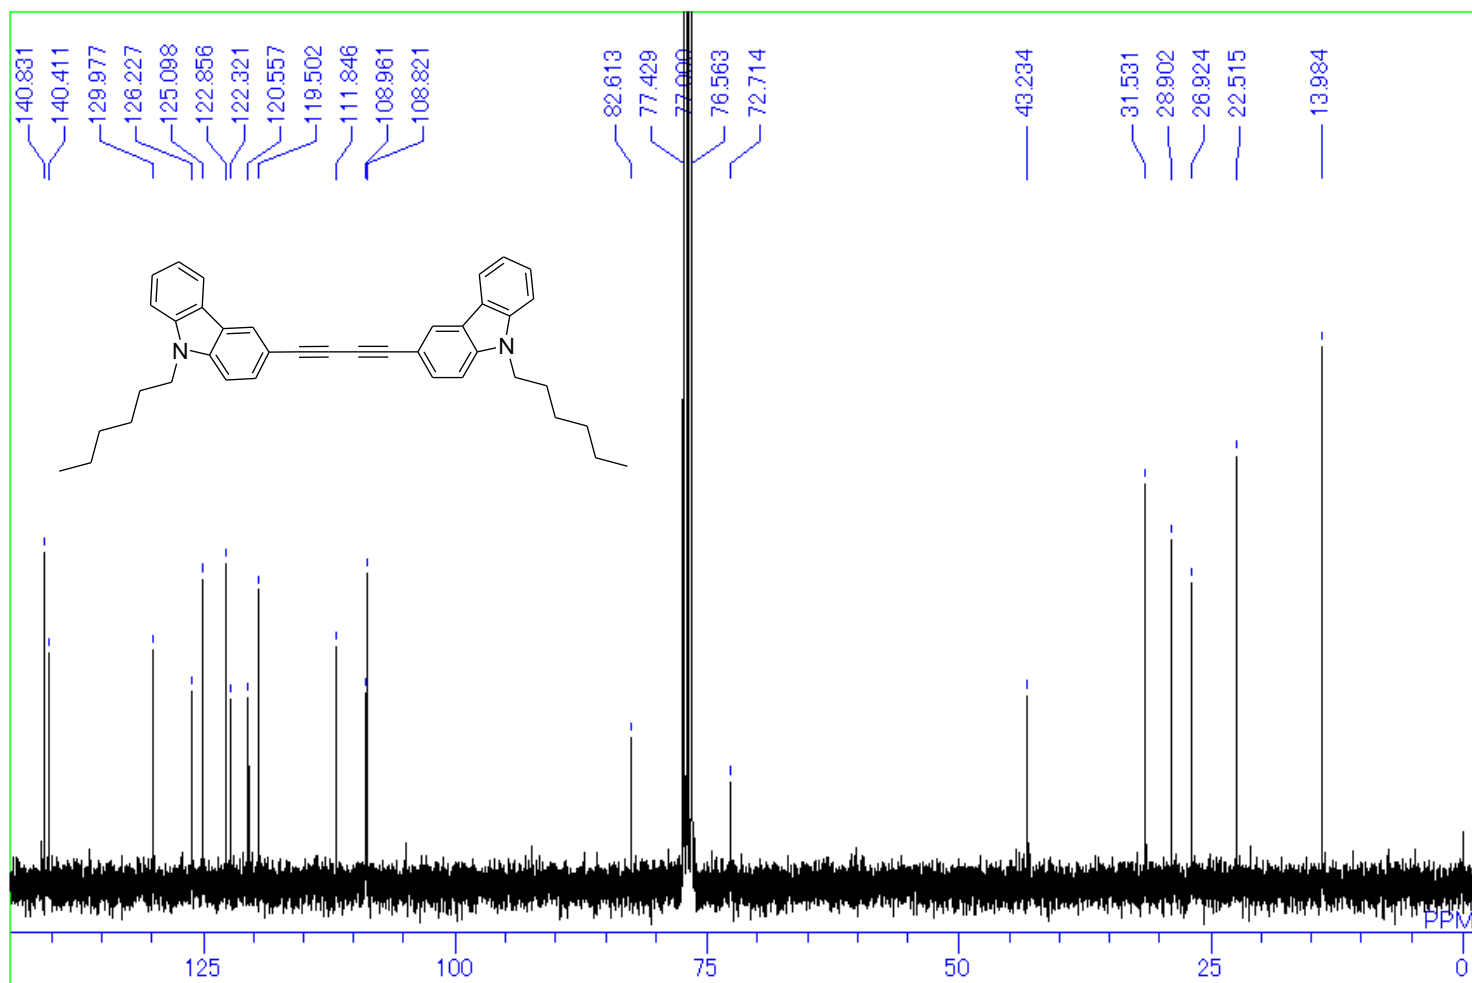

**Figure S24.**  $^{13}\text{C}$  NMR of Compound 2 in  $\text{CDCl}_3$



### $^{13}\text{C}$ NMR of Compound 3 in $\text{CDCl}_3$

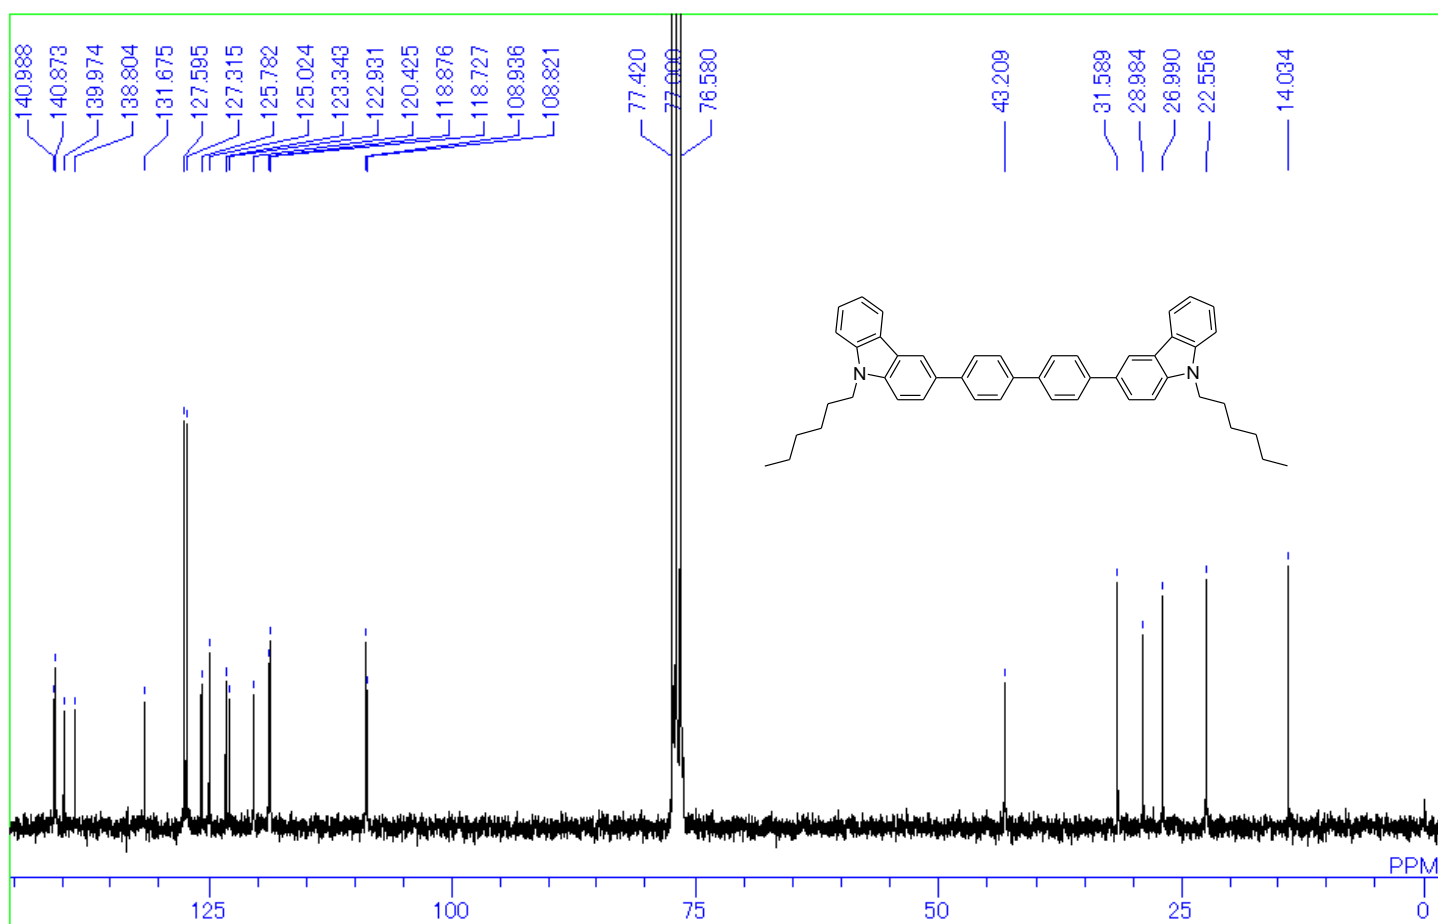

Figure S25.  $^{13}\text{C}$  NMR of Compound 3 in  $\text{CDCl}_3$

**$^{13}\text{C}$  NMR of Compound 4 in  $\text{CDCl}_3$**

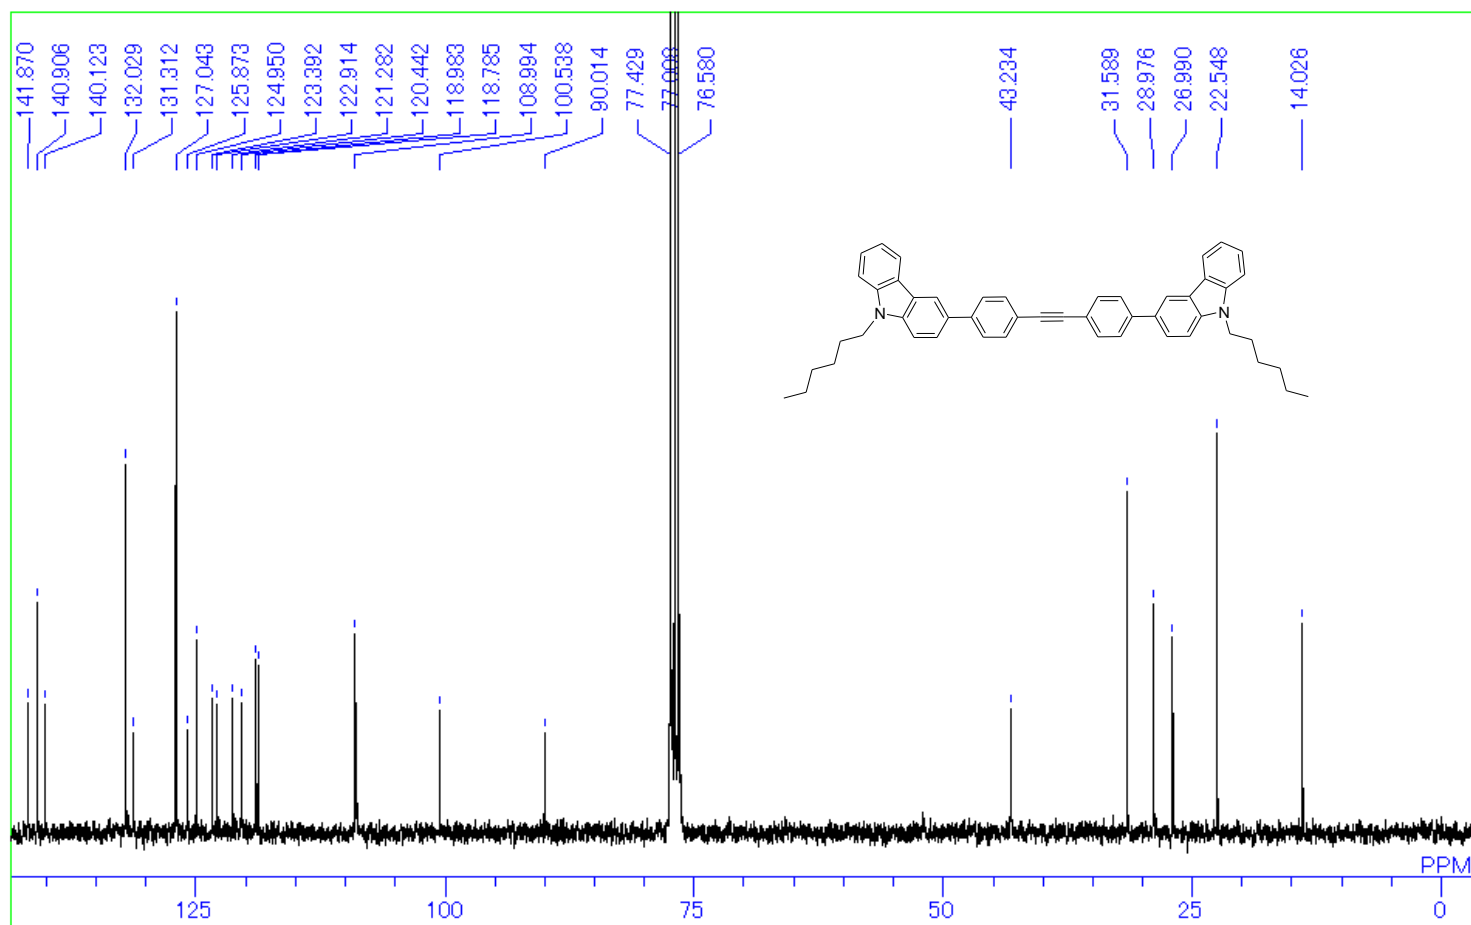

**Figure S26.  $^{13}\text{C}$  NMR of Compound 4 in  $\text{CDCl}_3$**

### $^{13}\text{C}$ NMR of Compound 5 in $\text{CDCl}_3$

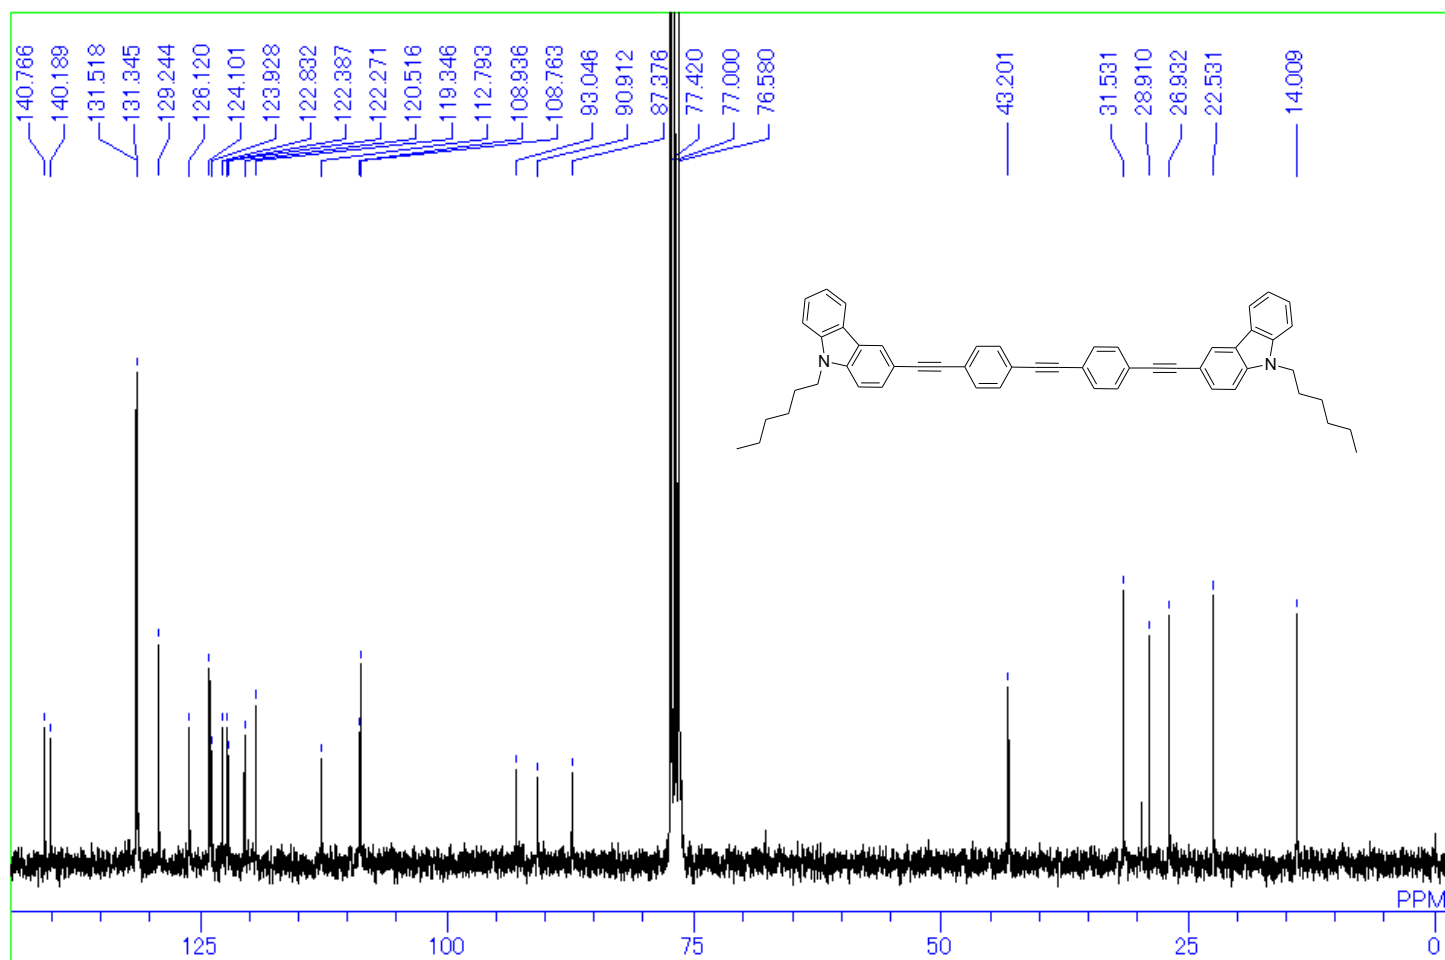

Figure S27.  $^{13}\text{C}$  NMR of Compound 5 in  $\text{CDCl}_3$

### Mass Spectrum of Compound 2

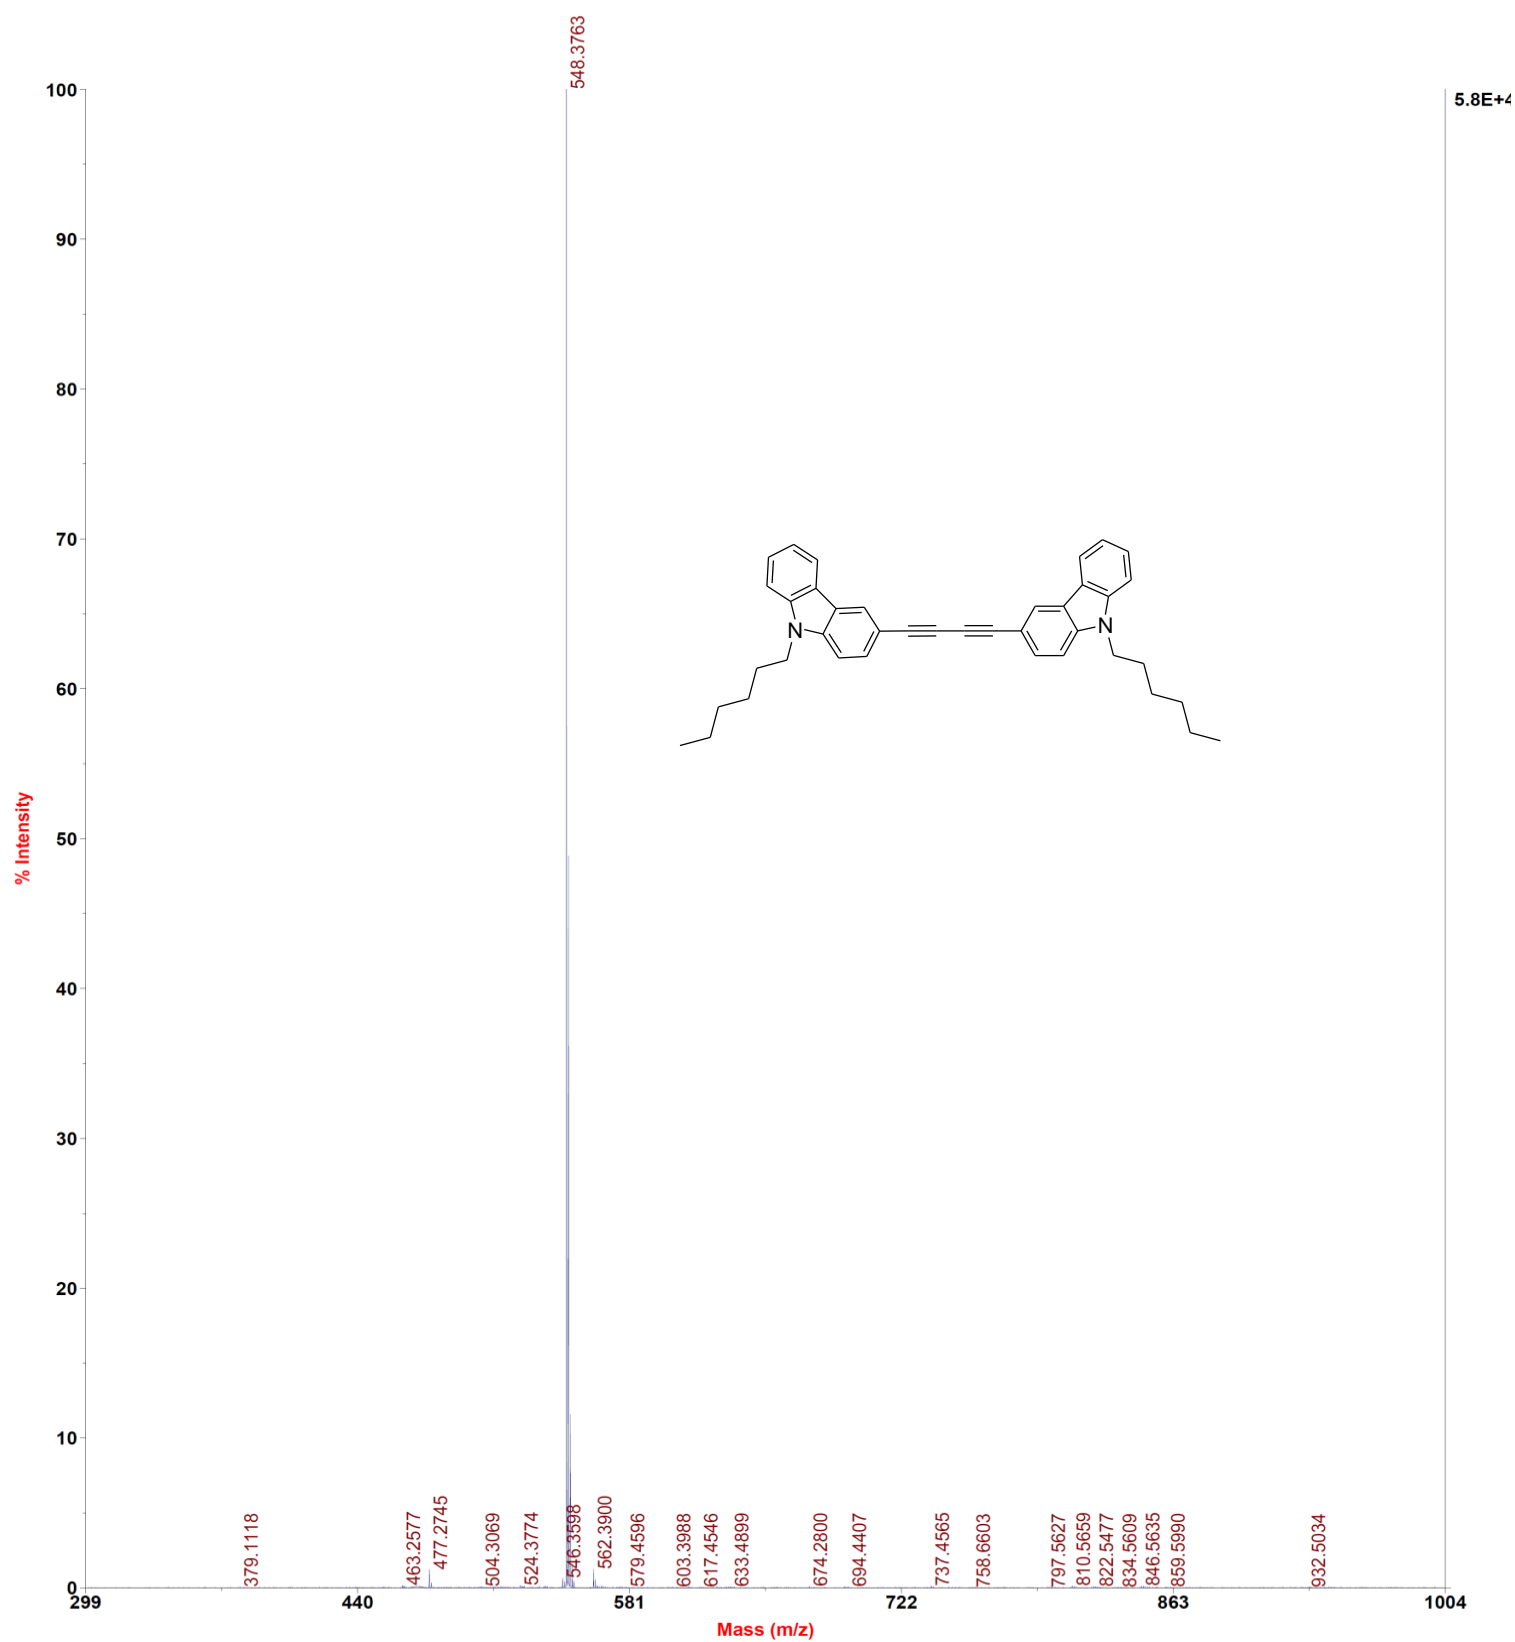

Figure S28. Mass Spectrum of Compound 2

### Mass Spectrum of Compound 3

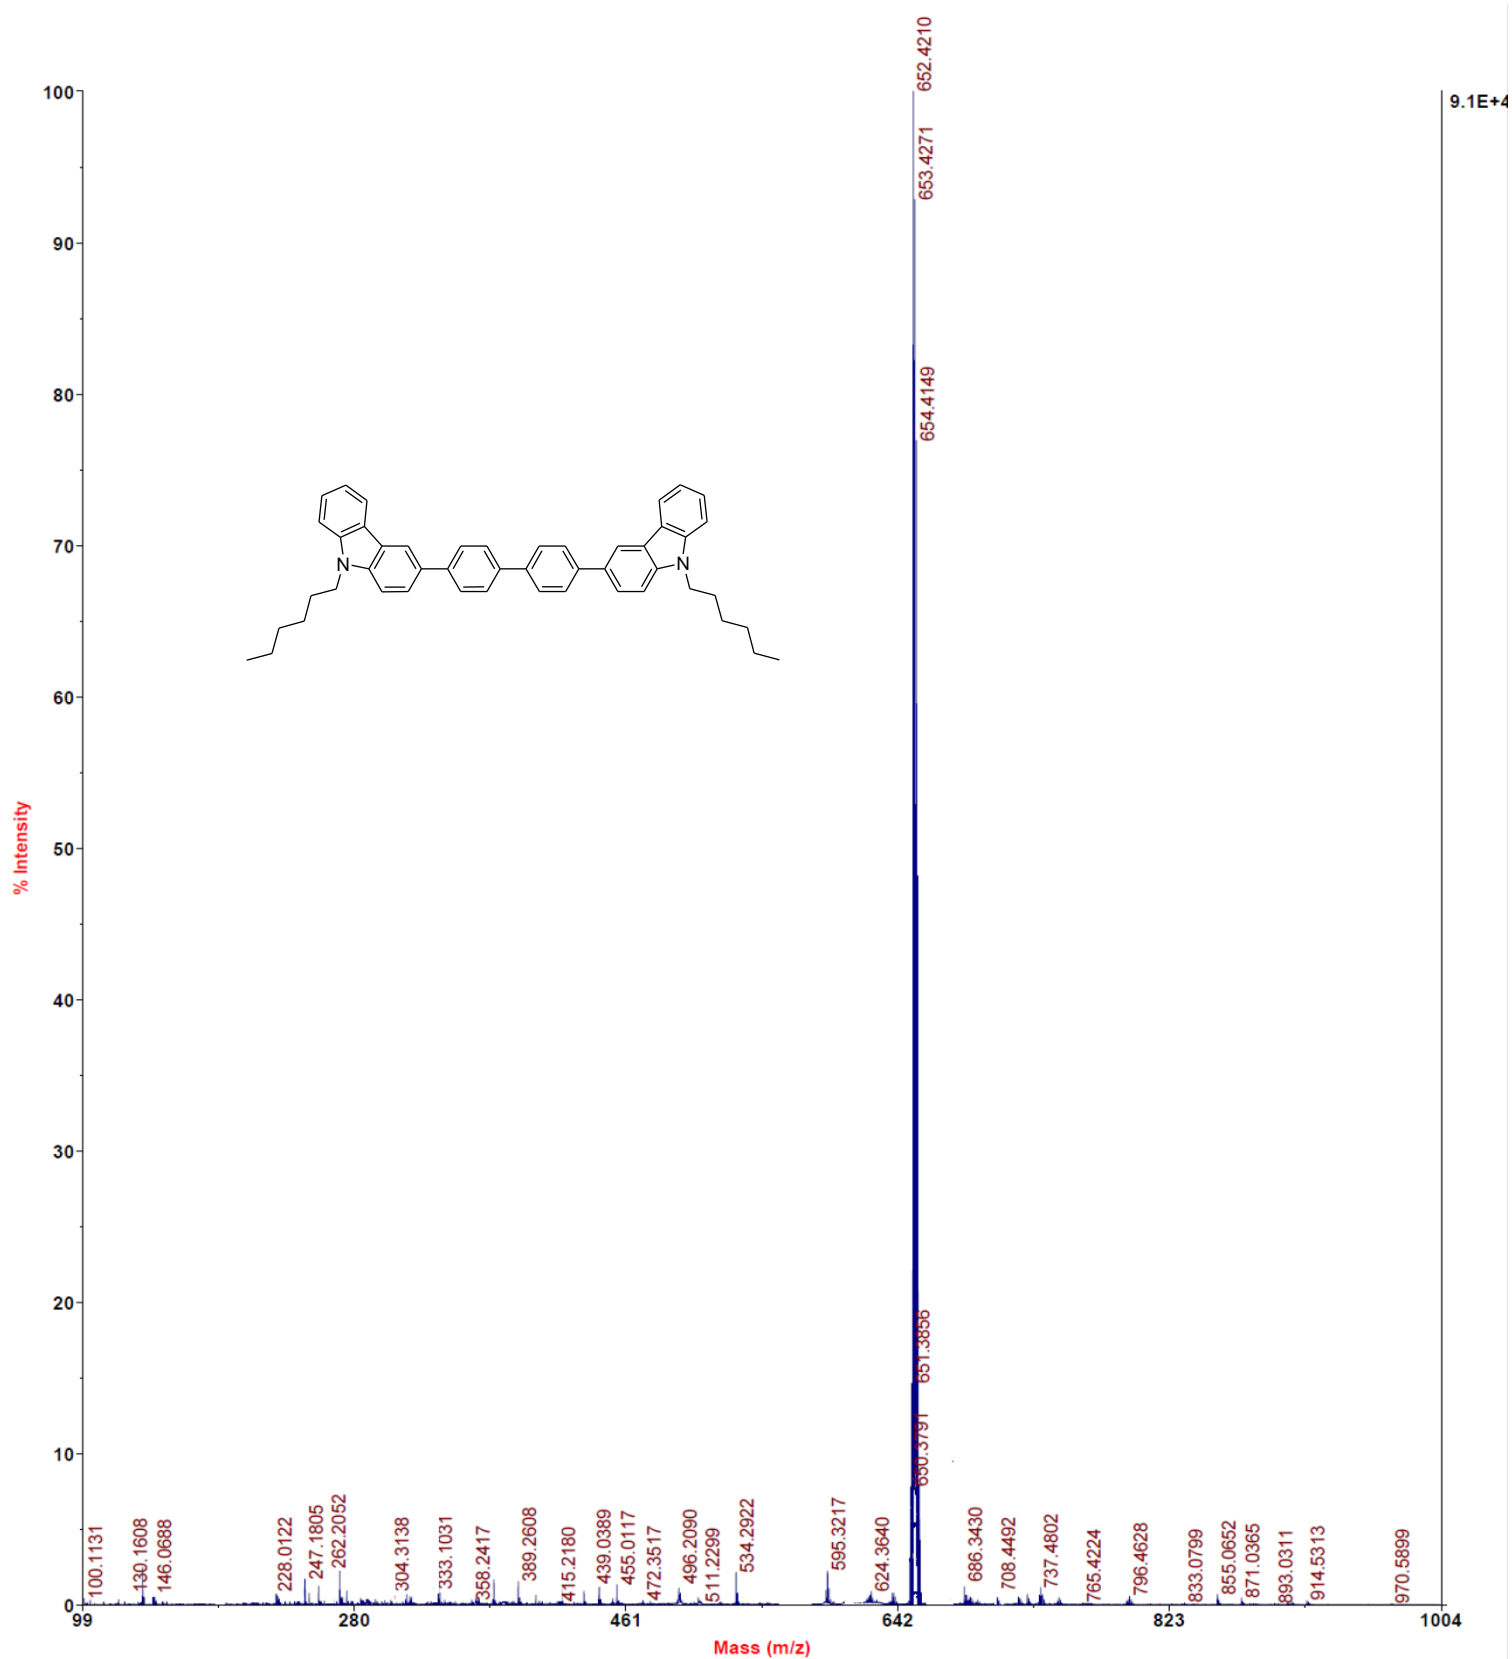

Figure S29. Mass Spectrum of Compound 3

### Mass Spectrum of Compound 4

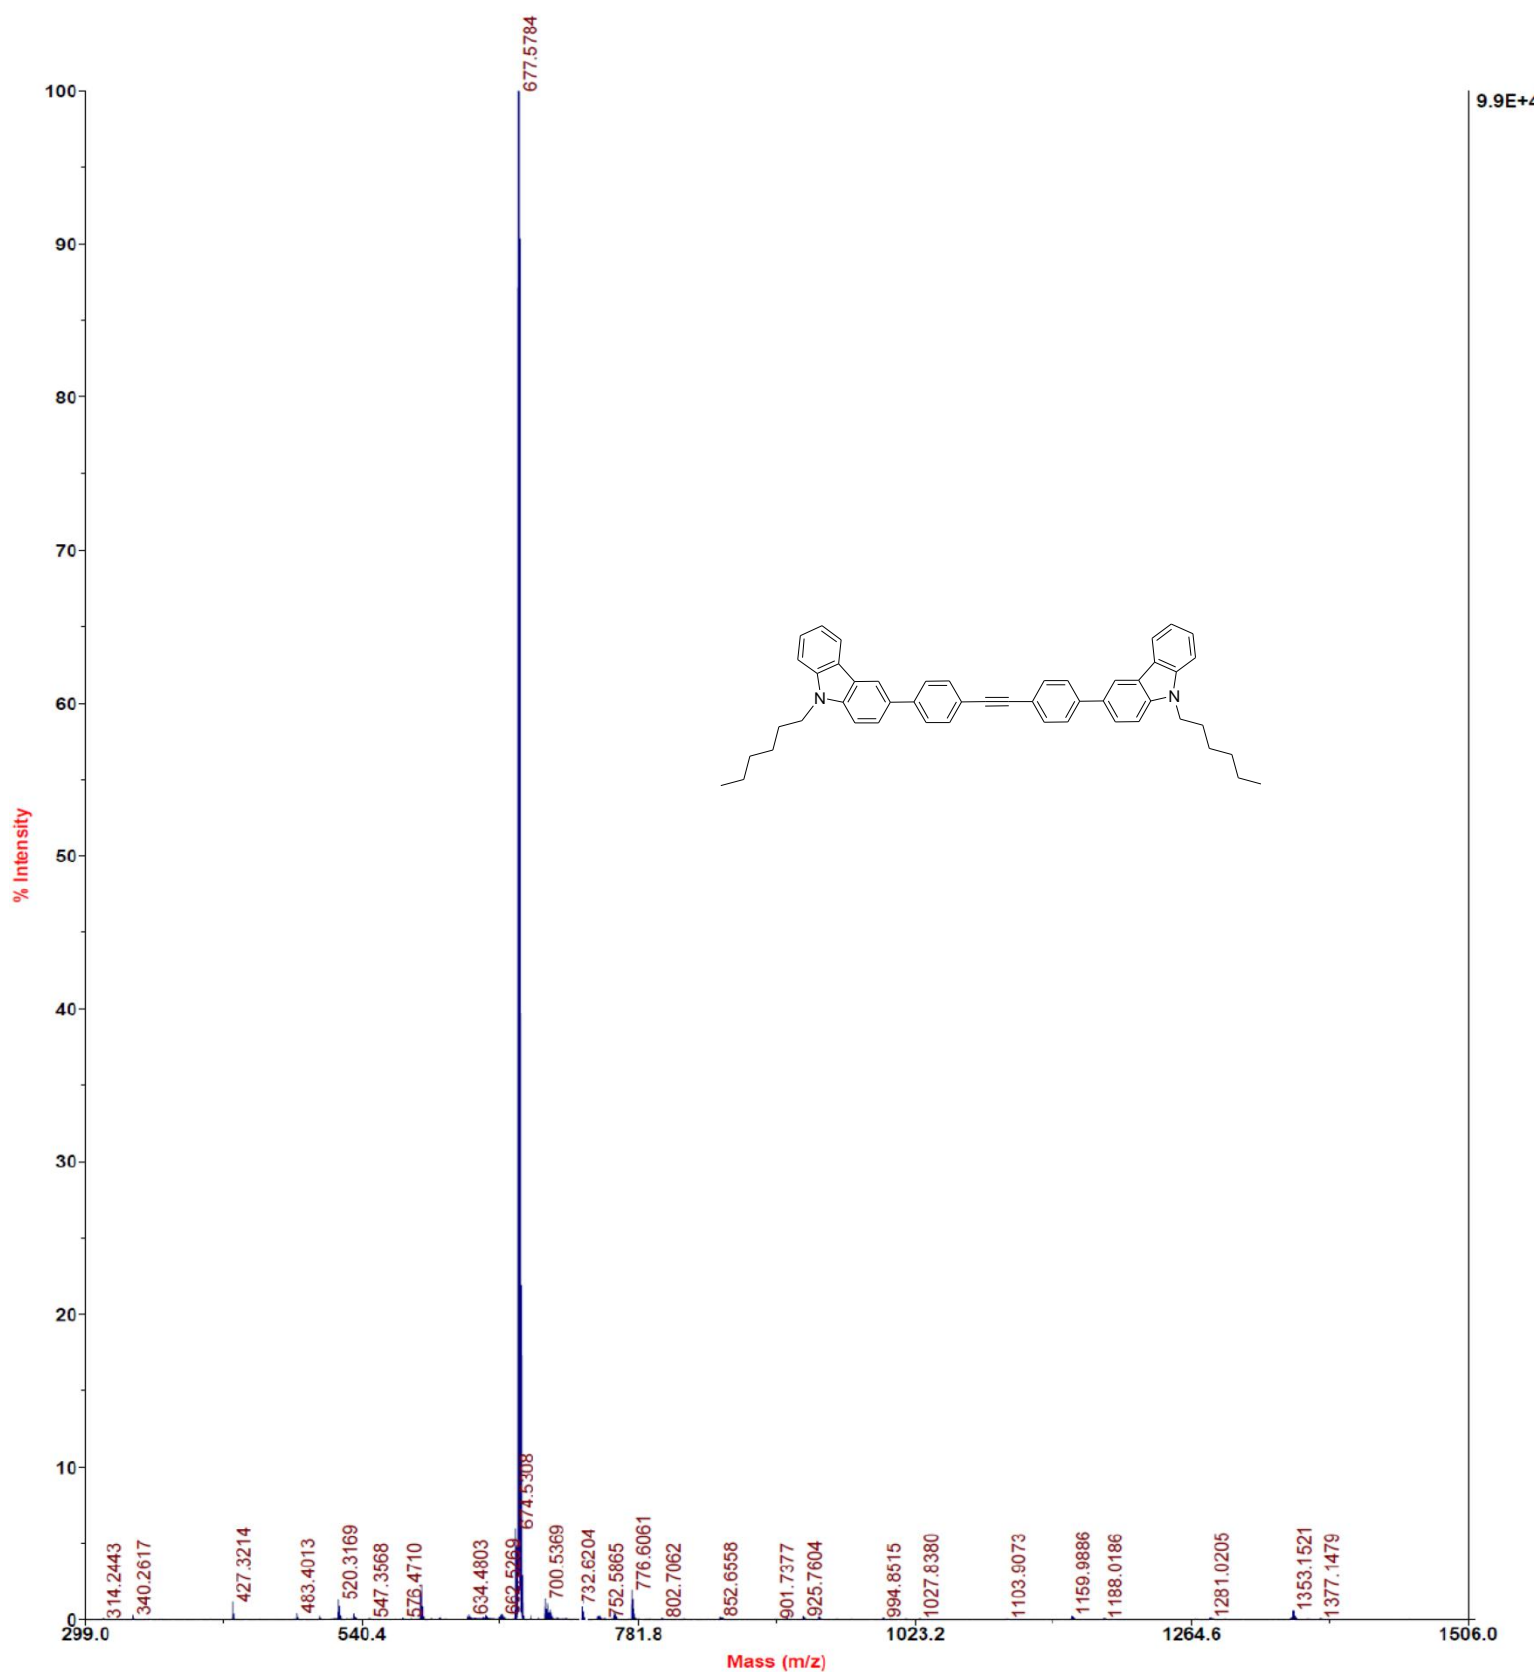

Figure S30. Mass Spectrum of Compound 4

### Mass Spectrum of Compound 5

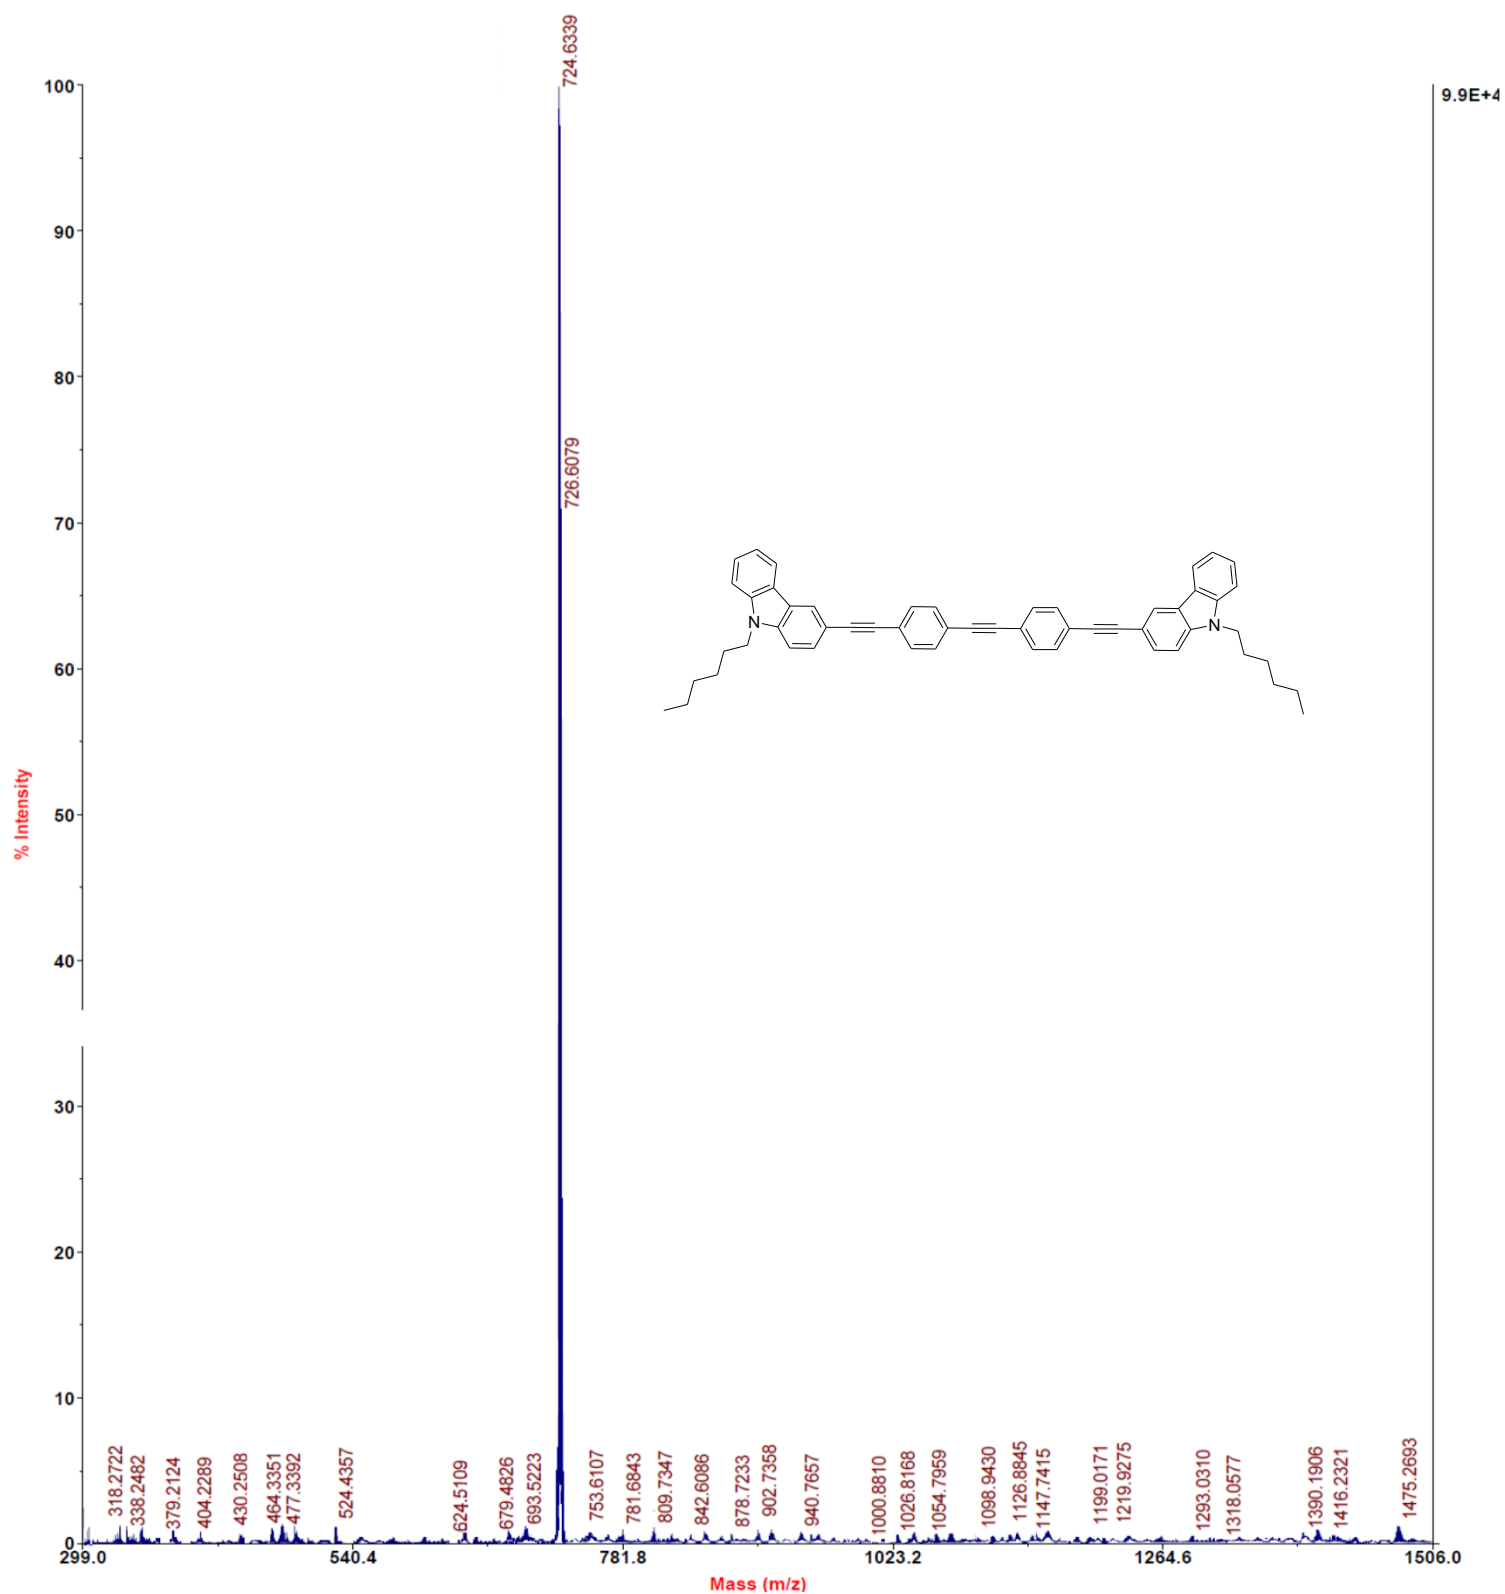

Figure S31. Mass Spectrum of Compound 5

### HPLC data of compound 2

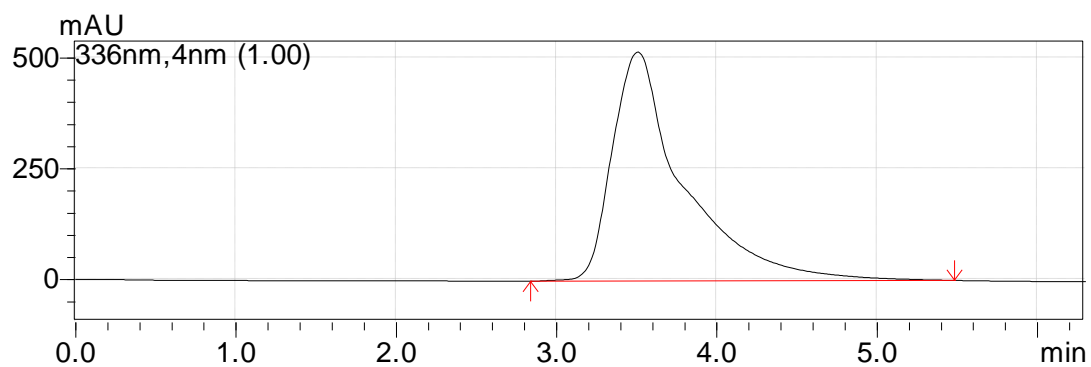

| Peak | Ret time | Area%    |
|------|----------|----------|
| 1    | 3.500    | 100.0000 |

### HPLC data of compound 3

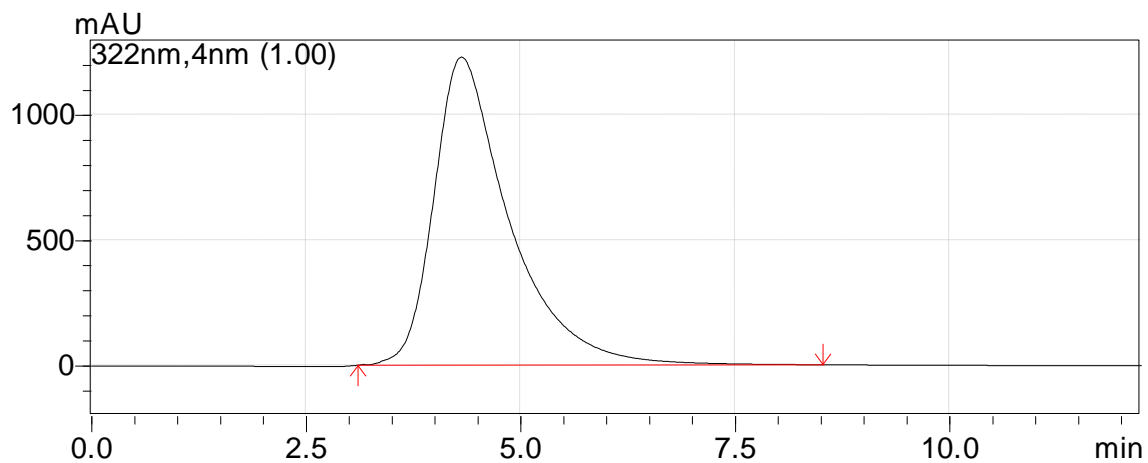

| Peak | Ret time | Area%    |
|------|----------|----------|
| 1    | 4.304    | 100.0000 |



### HPLC data of compound 4

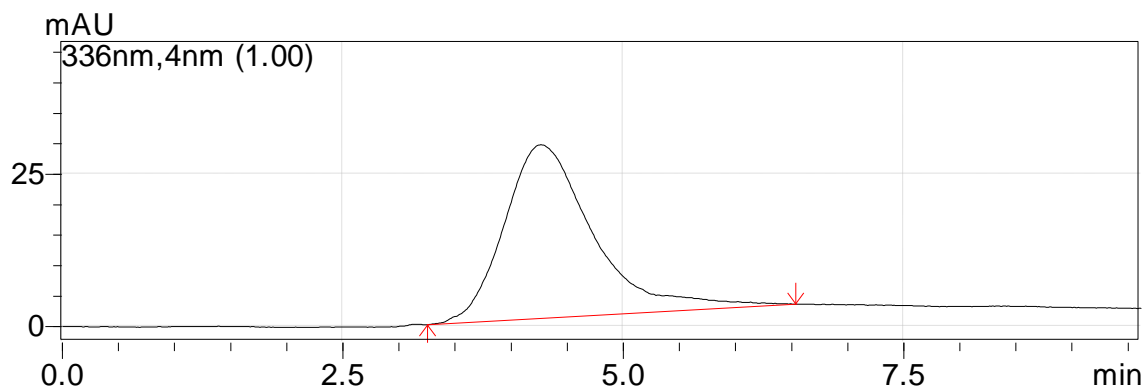

| Peak | Ret time | Area%    |
|------|----------|----------|
| 1    | 4.261    | 100.0000 |

### HPLC data of compound 5

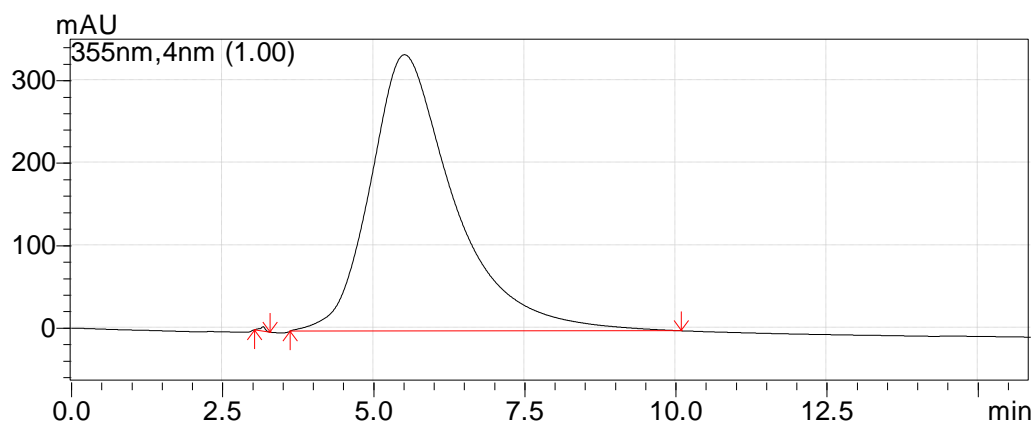

| Peak | Ret time | Area%   |
|------|----------|---------|
| 1    | 3.164    | 0.0936  |
| 2    | 5.503    | 99.9064 |
